# Supplementary material for: High performance long chain polyesters via melt copolymerization of cutin-inspired monomers
Source: Royal Society of Chemistry journal article supplement (doi:10.1039/d4su00454j), 2024-01-01
Supplement: d4su00454j1.pdf [file d4su00454j1.pdf]

# Supporting Information

## **High performance long chain polyesters via melt copolymerization of cutin-inspired monomers**

Zewen Zhu, Joshua T. Damron, Jong K. Keum, Logan Kearney, Vera Bocharova\*, and Jeffrey C. Foster\*

*Chemical Sciences Division, Oak Ridge National Laboratory, Oak Ridge, TN 37831*

## Supplemental Characterization Data

**Table S1:** Physico-chemical characteristics of copolymers and homopolymers

| Name                                             | Young's modulus (MPa) | Yield strength (MPa) | Tensile strength (MPa) | Elongation at break (%) | Toughness J/m <sup>3</sup> | $M_C$ (g/mol) | Swelling ratio (%) | Insoluble fraction (wt %) |
|--------------------------------------------------|-----------------------|----------------------|------------------------|-------------------------|----------------------------|---------------|--------------------|---------------------------|
| (1) PAA                                          | 296 ± 22              | 1.4 ± 0.4            | 2.2 ± 0.4              | 21.8 ± 4.6              | 28 ± 8                     | 5100          | 419.2              | 88.5                      |
| (2) P(AA <sub>0.7</sub> -co-HHA <sub>0.3</sub> ) | 493 ± 67              | 4.1 ± 0.5            | 10.1 ± 2.1             | 268.4 ± 43.6            | 2430 ± 430                 | 18000         | 450.0              | 88.3                      |
| (3) P(AA <sub>0.5</sub> -co-HHA <sub>0.5</sub> ) | 892 ± 24              | 5.1 ± 0.3            | 9.8 ± 1.6              | 271.2 ± 35.7            | 2610 ± 370                 | 11000         | 77.1               | 86.1                      |
| (4) P(AA <sub>0.3</sub> -co-HHA <sub>0.7</sub> ) | 872 ± 58              | 5.3 ± 0.6            | 10.8 ± 1.5             | 266.1 ± 32.1            | 2730 ± 350                 | 4300          | 74.3               | 85.1                      |
| (5) PHHA                                         | 1727 ± 57             | 5.3 ± 0.6            | 8.1 ± 0.8              | 7.1 ± 1.1               | 47 ± 7                     | N.A.          | N.A.               | N.A.                      |
| LDPE                                             | 292 ± 13              | 4.9 ± 0.3            | 11.5 ± 0.8             | 348.8 ± 45.2            | 3050 ± 390                 | N.A.          | N.A.               | N.A.                      |

**Table S2.** Summary of solid state <sup>13</sup>C NMR spectroscopic analysis.

| Sample                                       | %Conversion primary O-H | %Conversion secondary O-H |
|----------------------------------------------|-------------------------|---------------------------|
| P(AA)                                        | 56                      | 39                        |
| P(AA <sub>0.5</sub> -co-HHA <sub>0.5</sub> ) | 79                      | 49                        |
| P(HHA)                                       | 100                     | n.a.                      |

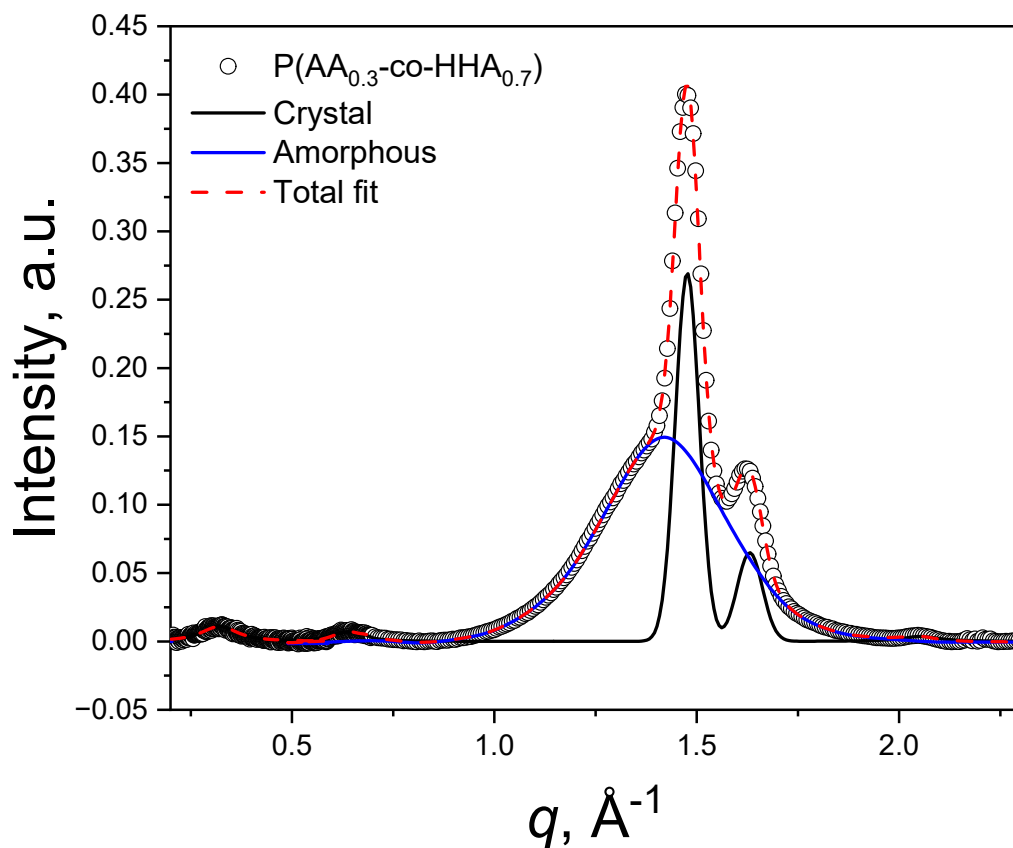

**Figure S1.** Exemplified peak deconvolution of the WAXS data for P(AA<sub>0.3</sub>-co-HHA<sub>0.7</sub>), where the choice of the fit was Voight functions.

**Table S3.** Results of the fitting of the WAXS data and corresponding crystallinity obtained from the fitting for studied polymers.

|                             | PHHA | P(AA <sub>0.3</sub> -co-HHA <sub>0.7</sub> ) | P(AA <sub>0.5</sub> -co-HHA <sub>0.5</sub> ) | P(AA <sub>0.7</sub> -co-HHA <sub>0.3</sub> ) | PAA  |
|-----------------------------|------|----------------------------------------------|----------------------------------------------|----------------------------------------------|------|
| Total crystalline peak area | 11.3 | 5.9                                          | 4.6                                          | 4.2                                          | 4.8  |
| Total amorphous peak area   | 8.2  | 9.3                                          | 11.3                                         | 12.3                                         | 14.9 |
| Total WAXS area             | 19.5 | 15.2                                         | 15.9                                         | 16.5                                         | 19.7 |
| % crystallinity             | 57.9 | 38.8                                         | 28.9                                         | 25.5                                         | 24.4 |

**Table S4:** Lamellar long periods from SAXS experiments.

| Name                                         | Lamellar long period, Lp |
|----------------------------------------------|--------------------------|
| PHHA                                         | 134.7 Å                  |
| P(AA <sub>0.3</sub> -co-HHA <sub>0.7</sub> ) | 119.4 Å                  |
| P(AA <sub>0.5</sub> -co-HHA <sub>0.5</sub> ) | 154.4 Å                  |
| P(AA <sub>0.7</sub> -co-HHA <sub>0.3</sub> ) | 132.3 Å                  |
| PAA                                          | 173.3 Å                  |

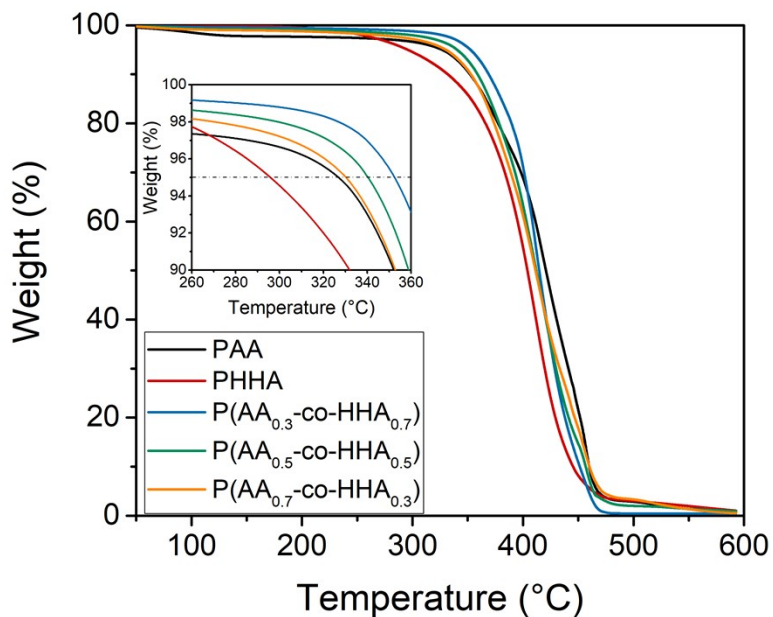

**Figure S2.** TGA results for all co-polymer and homopolymers. The inset contains zoomed-in area to better illustrate the onset of thermal degradation.

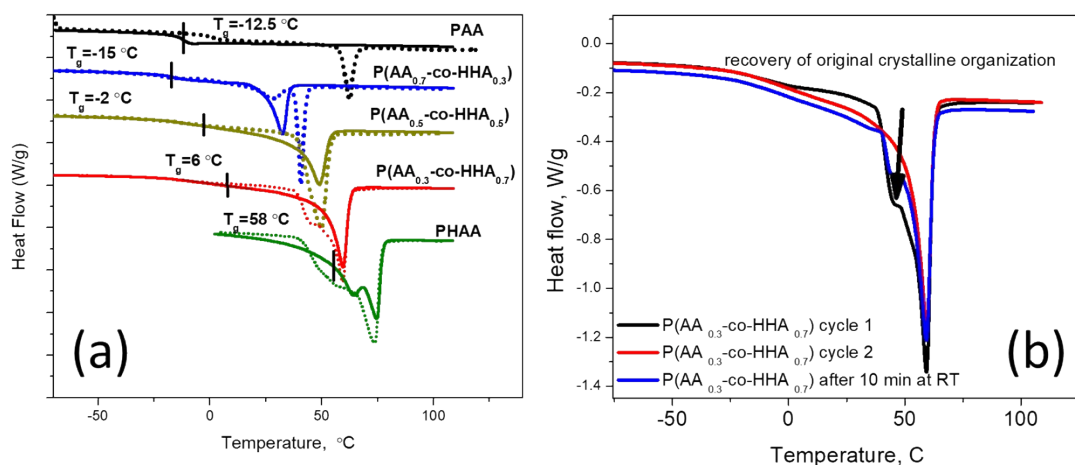

**Figure S3.** DSC a) first (dotted line) and second (solid line) heating cycles b) DSC of  $P(\text{AA}_{0.3}\text{-co-HHA}_{0.7})$ , which demonstrates the transient nature of the crystalline phase obtained after the cooling in DSC instrument.

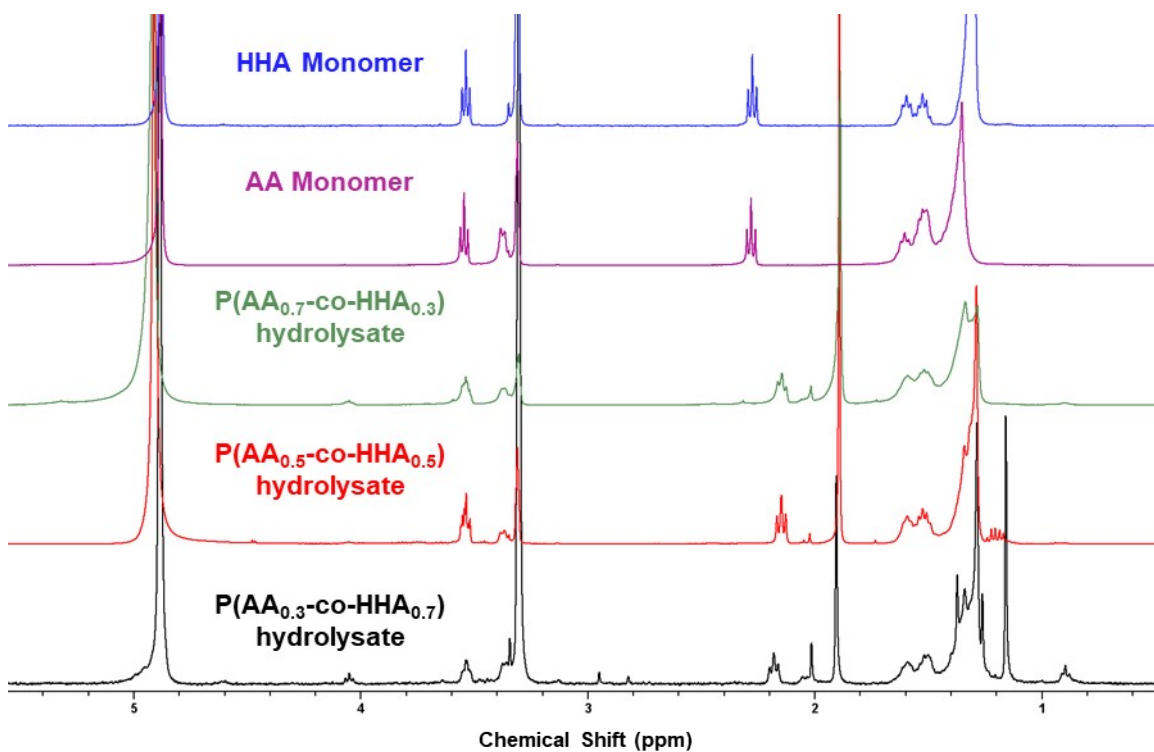

**Figure S4.**  $^1\text{H}$  NMR spectra in MeOD of HHA and AA monomers and the crude samples obtained via hydrolysis of the various copolymers.

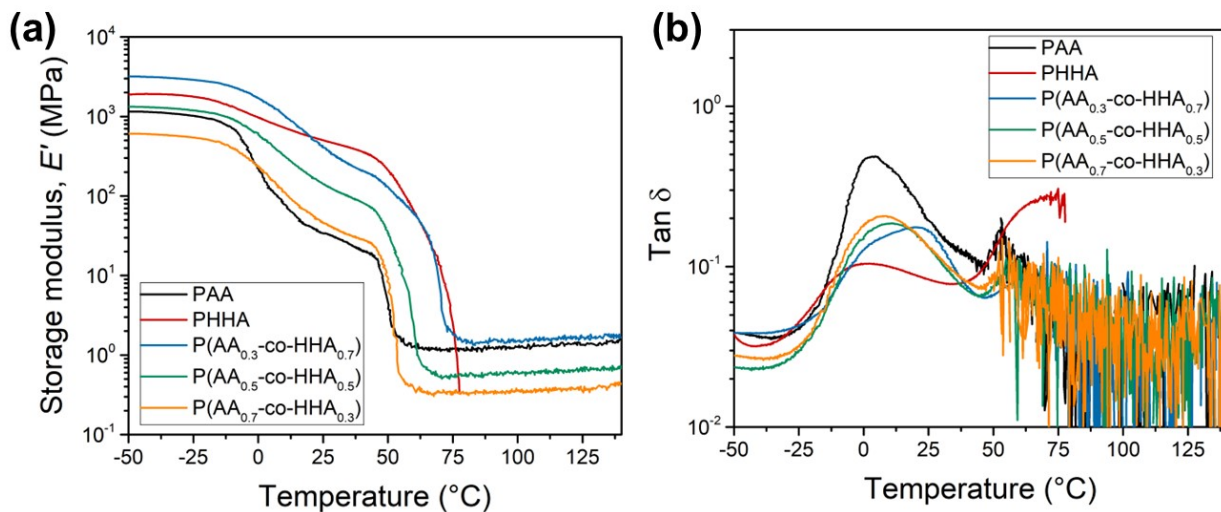

Figure S5. DMA results a) storage modulus b) tan delta.

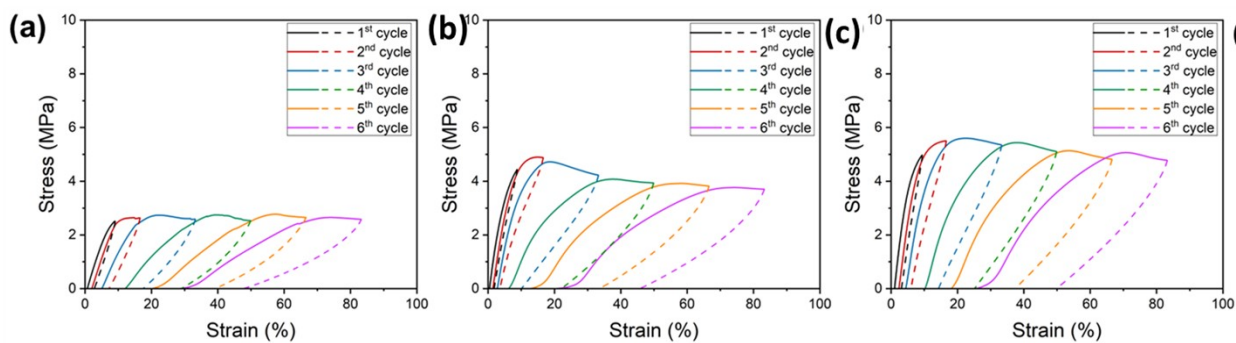

Figure S6 Cyclic DMA tests for a)  $\text{P}(\text{AA}_{0.7}\text{-co-HHA}_{0.3})$ ; b)  $\text{P}(\text{AA}_{0.5}\text{-co-HHA}_{0.5})$ ; and c)  $\text{P}(\text{AA}_{0.3}\text{-co-HHA}_{0.7})$  tested at 25  $^{\circ}\text{C}$ .

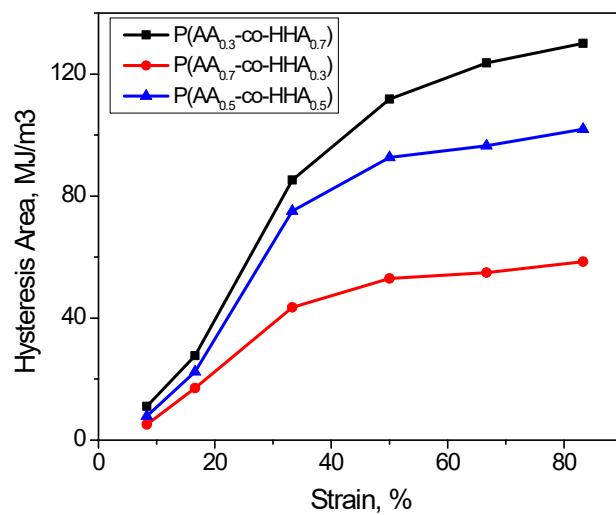

**Figure S7.** Plots of hysteresis area vs. applied max strain for copolymers.

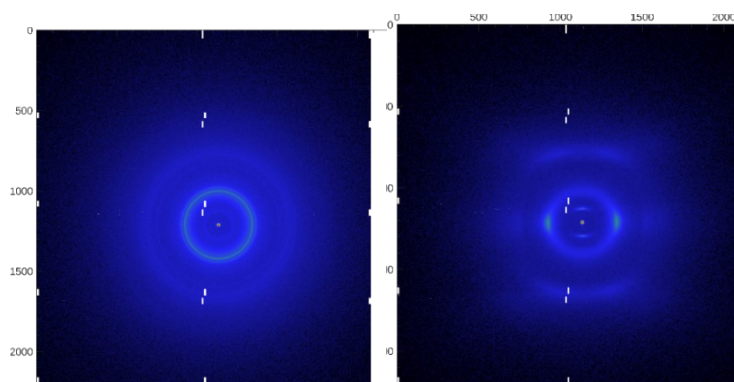

**Figure S8.** 2D WAXS images of P(AA<sub>0.5</sub>-co-HHA<sub>0.5</sub>) at the condition of pristine and 200% stretching.
